# Supplementary material for: Cellular binding of anionic nanoparticles is inhibited by serum proteins independent of nanoparticle composition
Source: Royal Society of Chemistry journal article supplement (doi:10.1039/c3bm60121h), 2013-01-01
Supplement: c3bm60121h.pdf [file c3bm60121h.pdf]

## Cellular Binding of Anionic Nanoparticles is Inhibited by Serum Proteins Independent of Nanoparticle Composition

Candace C. Fleischer, Umesh Kumar and Christine K. Payne\*

School of Chemistry and Biochemistry and Petit Institute for Bioengineering and Bioscience, Georgia Institute of Technology, 901 Atlantic Drive, Atlanta, GA, 30332, USA.

\* To whom correspondence should be addressed. E-mail: [christine.payne@chemistry.gatech.edu](mailto:christine.payne@chemistry.gatech.edu); Tel: 404-385-3125; Fax: 404-385-6057

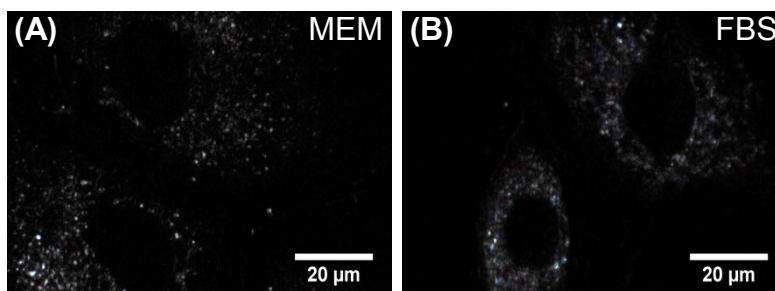

**Figure S1.** Dark field images of BS-C-1 cells without Au NPs in (A) MEM and (B) MEM supplemented with FBS, demonstrating scattering due to cells alone.

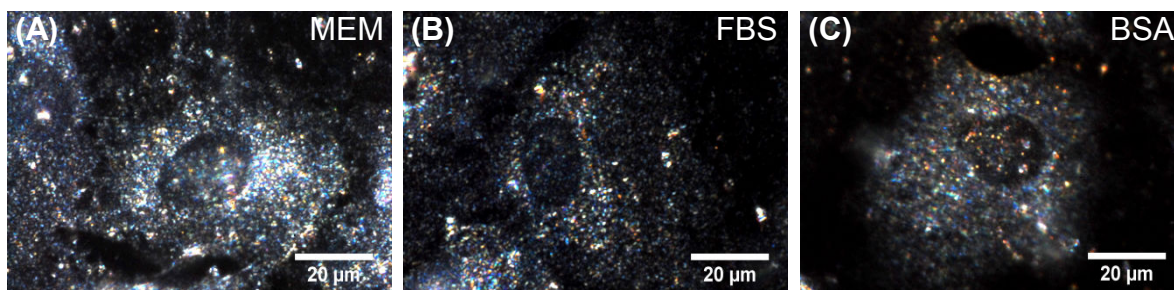

**Figure S2.** Dark field microscopy images of citrate-modified protein-Au NP complexes (yellow) bound to BS-C-1 cells after incubation for 30 minutes at 4 °C in (A) MEM, (B) MEM supplemented with FBS, and (C) MEM supplemented with BSA. Images of cells without Au NPs are presented in Figure S1.
